# Supplementary material for: What the skull and scapular morphology of the dugong (Dugong dugon) can tell us: sex, habitat and body length?
Source: PubMed Central journal article supplement (PMC5434023; doi:10.1038/s41598-017-01899-7), 2017-05-16
Supplement: 41598_2017_1899_MOESM1_ESM.pdf [file 41598_2017_1899_MOESM1_ESM.pdf]

## What the skull and scapular morphology of the dugong (*Dugong dugon*) can tell us: sex, habitat and body length?

Korakot Nganvongpanit, Kittisak Buddhachat, Patcharaporn Kaewmong, Phaothep Cherdsookjai & Kongkiat Kittiwatanawong

### Supplement 1 Samples information

|    | Sample ID<br>(DUxxx) | Sex     |        | Body length<br>(meter) | Habitat        |                     |
|----|----------------------|---------|--------|------------------------|----------------|---------------------|
|    |                      | Male    | Female |                        | Andaman<br>Sea | Gulf of<br>Thailand |
| 1  | 014                  | 1       |        | 1.70                   | 1              |                     |
| 2  | 016                  | 1       |        | 2.54                   | 1              |                     |
| 3  | 036                  |         | 1      | 2.73                   | 1              |                     |
| 4  | 037                  |         | 1      | 1.70                   | 1              |                     |
| 5  | 038                  | 1       |        | 2.57                   | 1              |                     |
| 6  | 040                  | 1       |        | 2.94                   | 1              |                     |
| 7  | 043                  |         | 1      | 2.14                   |                | 1                   |
| 8  | 047                  | 1       |        | 2.21                   | 1              |                     |
| 9  | 048                  |         | 1      | 2.71                   |                | 1                   |
| 10 | 049                  | unknown |        | 2.26                   | 1              |                     |
| 11 | 050                  | unknown |        | unknown                | 1              |                     |
| 12 | 057                  |         | 1      | 2.56                   | 1              |                     |
| 13 | 058                  | 1       |        | 2.50                   | 1              |                     |
| 14 | 059                  | 1       |        | 2.45                   | 1              |                     |
| 15 | 060                  | 1       |        | 1.92                   | 1              |                     |
| 16 | 070                  | 1       |        | 2.00                   | 1              |                     |
| 17 | 074                  | 1       |        | 2.06                   | 1              |                     |
| 18 | 075                  | 1       |        | 2.40                   | 1              |                     |
| 19 | 078                  |         | 1      | 2.31                   |                | 1                   |
| 20 | 088                  | 1       |        | 2.14                   |                | 1                   |
| 21 | 098                  | 1       |        | 2.14                   |                | 1                   |
| 22 | 103                  | 1       |        | 1.67                   | 1              |                     |
| 23 | 119                  | 1       |        | 1.53                   | 1              |                     |
| 24 | 126                  |         | 1      | 2.00                   | 1              |                     |
| 25 | 129                  |         | 1      | 2.25                   | 1              |                     |
| 26 | 130                  | 1       |        | 2.09                   |                | 1                   |
| 27 | 143                  |         | 1      | 2.00                   | 1              |                     |
| 28 | 144                  | 1       |        | 2.64                   | 1              |                     |
| 29 | 145                  | 1       |        | 1.56                   | 1              |                     |
| 30 | 146                  | 1       |        | 2.14                   | 1              |                     |
| 31 | 209                  | unknown |        | 1.60                   |                | 1                   |
| 32 | 227                  | 1       |        | 2.47                   | 1              |                     |

|    |     |         |   |      |   |   |
|----|-----|---------|---|------|---|---|
| 33 | 229 | unknown |   | 1.80 | 1 |   |
| 34 | 233 |         | 1 | 2.64 | 1 |   |
| 35 | 234 |         | 1 | 2.57 | 1 |   |
| 36 | 236 |         | 1 | 2.54 | 1 |   |
| 37 | 241 |         | 1 | 2.29 | 1 |   |
| 38 | 243 |         | 1 | 2.57 | 1 |   |
| 39 | 248 |         | 1 | 1.91 | 1 |   |
| 40 | 250 |         | 1 | 2.38 |   | 1 |
| 41 | 258 |         | 1 | 2.31 |   | 1 |
| 42 | 260 |         | 1 | 1.74 | 1 |   |
| 43 | 268 | 1       |   | 1.92 | 1 |   |
| 44 | 270 | 1       |   | 1.60 | 1 |   |
| 45 | 272 | 1       |   | 2.45 |   | 1 |
| 46 | 273 | unknown |   | 1.80 | 1 |   |
| 47 | 283 |         | 1 | 3.00 | 1 |   |
| 48 | 285 |         | 1 | 2.00 |   | 1 |
| 49 | 286 | 1       |   | 1.61 | 1 |   |
| 50 | 287 |         | 1 | 1.91 | 1 |   |
| 51 | 291 |         | 1 | 2.63 | 1 |   |
| 52 | 292 |         | 1 | 2.82 | 1 |   |
| 53 | 293 | 1       |   | 1.90 | 1 |   |
| 54 | 297 |         | 1 | 1.66 | 1 |   |
| 55 | 299 |         | 1 | 2.81 | 1 |   |
| 56 | 300 |         | 1 | 2.24 | 1 |   |
| 57 | 301 | 1       |   | 2.44 | 1 |   |
| 58 | 306 | 1       |   | 2.02 | 1 |   |
| 59 | 307 |         | 1 | 2.78 | 1 |   |
| 60 | 322 | 1       |   | 2.42 | 1 |   |
| 61 | 323 | 1       |   | 1.92 | 1 |   |
| 62 | 328 |         | 1 | 2.59 | 1 |   |
| 63 | 329 |         | 1 | 1.63 | 1 |   |
| 64 | 330 |         | 1 | 2.56 | 1 |   |
| 65 | 332 | 1       |   | 1.94 | 1 |   |
| 66 | 336 | 1       |   | 2.00 | 1 |   |
| 67 | 337 | 1       |   | 2.81 | 1 |   |
| 68 | 339 | 1       |   | 1.16 | 1 |   |
| 69 | 341 |         | 1 | 2.67 | 1 |   |
| 70 | 344 |         | 1 | 1.60 | 1 |   |
| 71 | 345 | 1       |   | 2.52 | 1 |   |
| 72 | 346 | 1       |   | 2.14 | 1 |   |
| 73 | 347 |         | 1 | 2.58 | 1 |   |
| 74 | 349 |         | 1 | 2.35 | 1 |   |
| 75 | 350 |         | 1 | 1.38 | 1 |   |
| 76 | 354 |         | 1 | 2.04 | 1 |   |

|    |     |   |   |      |   |  |
|----|-----|---|---|------|---|--|
| 77 | 358 |   | 1 | 1.97 | 1 |  |
| 78 | 359 | 1 |   | 2.11 | 1 |  |
| 79 | 361 |   | 1 | 0.88 | 1 |  |
| 80 | 364 | 1 |   | 3.64 | 1 |  |
| 81 | 366 |   | 1 | 2.55 | 1 |  |
